# Supplementary material for: Cluster-based characterization of multi-dimensional tropospheric ozone variability in coastal regions: an analysis of lidar measurements and model results
Source: Copernicus journal article supplement (doi:10.5194/acp-2022-133), 2022-03-23
Supplement: Supplementary file 1 [file acp-2022-133-supplement.pdf]

## Supplementary File

| <b>Table 2. Mean percent bias &amp; Correlation coefficient (R)</b> |           |           |           |           |           |
|---------------------------------------------------------------------|-----------|-----------|-----------|-----------|-----------|
| <b>a) GEOS-Chem<br/>Low-level</b>                                   | Cluster 1 | Cluster 2 | Cluster 3 | Cluster 4 | Cluster 5 |
| <b>Bias</b>                                                         | - 0.051   | 0.020     | 0.068     | - 0.026   | - 0.039   |
| <b>R</b>                                                            | 0.53      | 0.55      | 0.51      | 0.61      | 0.55      |
| <b>b) GEOS-Chem<br/>Mid-level</b>                                   |           |           |           |           |           |
| <b>Bias</b>                                                         | - 0.268   | - 0.241   | - 0.150   | - 0.167   | - 0.096   |
| <b>R</b>                                                            | - 0.002   | - 0.033   | - 0.26    | 0.11      | 0.23      |
| <b>c) GEOS-CF<br/>Low-level</b>                                     |           |           |           |           |           |
| <b>Bias</b>                                                         | 0.139     | 0.189     | 0.340     | 0.241     | 0.197     |
| <b>R</b>                                                            | 0.74      | 0.60      | 0.56      | 0.61      | 0.54      |
| <b>d) GEOS-CF<br/>Mid-level</b>                                     |           |           |           |           |           |
| <b>Bias</b>                                                         | - 0.143   | - 0.044   | 0.021     | 0.008     | 0.112     |
| <b>R</b>                                                            | 0.43      | 0.14      | - 0.19    | 0.21      | 0.74      |

**Table S1.** Calculated mean percent bias and correlation coefficient (R) by cluster. a) Low-level GEOS-Chem, b) Mid-level GEOS-Chem; c) Low-level GEOS-CF and d) Mid-level GEOS-CF results.

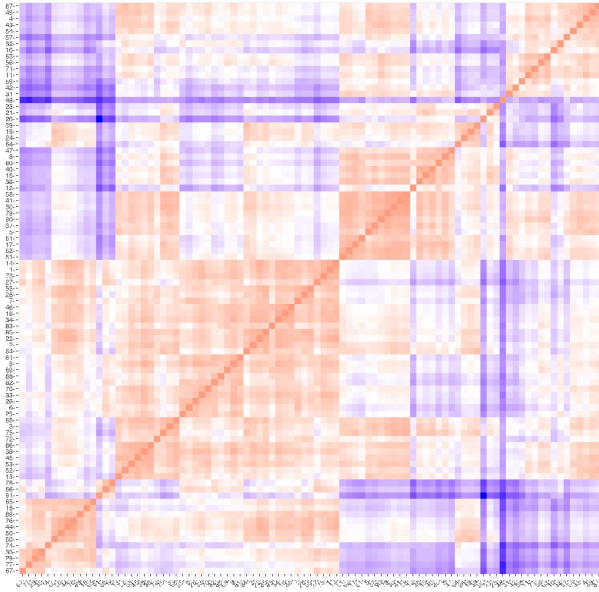

**Figure S1.** Visual assessment of cluster tendency (VAT) approach. Dataset high similarity (red) and low similarity (blue).

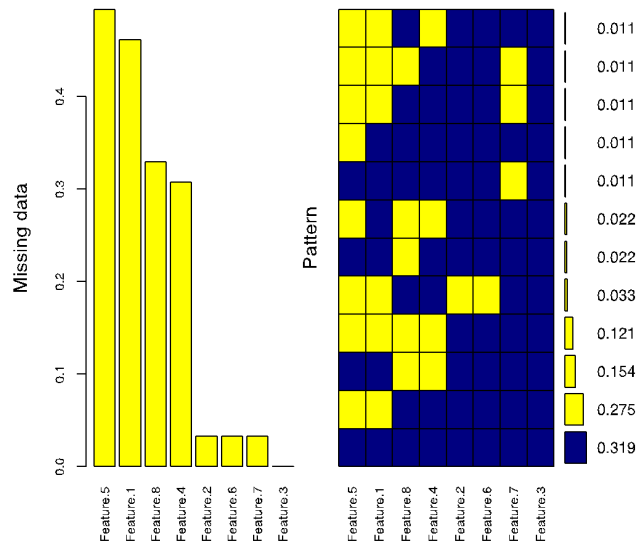

**Figure S2.** Percentage and pattern of missing data points by each feature used for clustering.

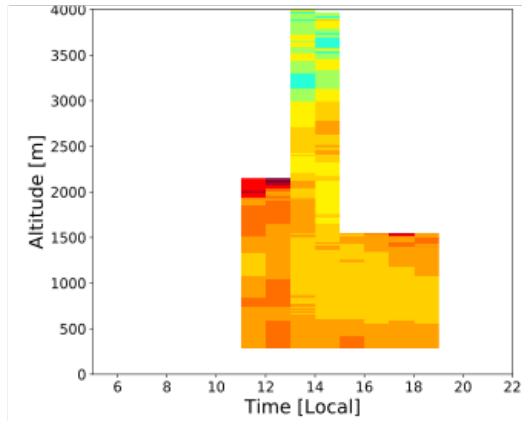

**Figure S3.** Results from the clustering: Cluster 6 which was assigned only one date (2018-06-17). Considered an outlier and was removed from the analysis.

(a) GEOS – Chem model

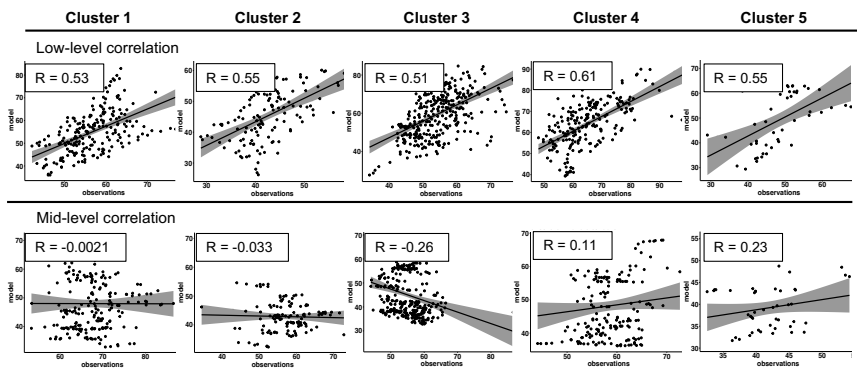

(b) GEOS – CF model

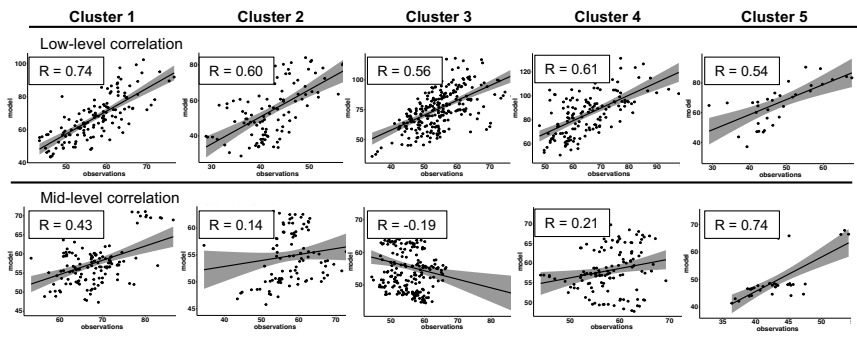

**Figure S4.** O<sub>3</sub> correlation between lidar observations and a) GEOS-Chem model simulation results and b) GEOS-CF model results by each cluster split by low-level (top panel) and mid-level (bottom panel).
